# Supplementary material for: In Silico Discovery of Potential Inhibitors Targeting the RNA Binding Loop of ADAR2 and 5-HT2CR from Traditional Chinese Natural Compounds
Source: MDPI journal article supplement (doi:10.3390/ijms241612612), 2023-08-09
Supplement: s1 [file s1]

### **Supplementary Information**

#### **In Silico Discovery of Potential Inhibitors Targeting the RNA Binding Loop of ADAR2 and 5-HT2CR from Traditional Chinese Natural Compounds**

Emmanuel Broni <sup>1</sup>, Carolyn Ashley <sup>1</sup>, Miriam Velazquez <sup>1,2</sup>, Sufia Khan <sup>1,3</sup>, Andrew Striegel <sup>1,4</sup>, Patrick O. Sakyi <sup>4,5</sup>, Saqib Peracha <sup>1</sup>, Kristeen Bebla <sup>1,2</sup>, Monsheel Sodhi <sup>2</sup>, Samuel K. Kwofie <sup>7,8</sup>, Adesanya Ademokunwa <sup>1,9</sup>, Whelton A. Miller III <sup>1,5\*</sup>

<sup>1</sup> Department of Medicine, Loyola University Medical Center, Loyola University Chicago, Maywood, IL, 60153, USA; [ebroni@luc.edu](mailto:ebroni@luc.edu) (E.B.); [cashley1@luc.edu](mailto:cashley1@luc.edu) (C.A.); [skhan96@luc.edu](mailto:skhan96@luc.edu) (S.K.); [astrieg2@nd.edu](mailto:astrieg2@nd.edu) (A.S.); [speracha@luc.edu](mailto:speracha@luc.edu) (S.P.); [mvelazquez4@luc.edu](mailto:mvelazquez4@luc.edu) (M.V.); [kbebla@luc.edu](mailto:kbebla@luc.edu) (K.B.); [aademokunwa@luc.edu](mailto:aademokunwa@luc.edu) (A.A.)

<sup>2</sup> Department of Molecular Pharmacology & Neuroscience, Loyola University Medical Center, Loyola University Chicago, Maywood, IL, 60153, USA; [msodhi@luc.edu](mailto:msodhi@luc.edu) (M.S.)

<sup>3</sup> Department of Biology, Loyola University Chicago, Chicago, IL 60660, USA;

<sup>4</sup> Department of Chemical and Biochemistry, College of Science, University of Notre Dame, Notre Dame, IN 46556 USA;

<sup>5</sup> Department of Chemistry, School of Physical and Mathematical Sciences, College of Basic and Applied Sciences, University of Ghana, P. O. BOX LG 56, Legon, Accra, Ghana;

<sup>6</sup> Department of Chemical Sciences, School of Sciences, University of Energy and Natural Resources, Box 214, Sunyani, Ghana; [patrick.sakyi@uenr.edu.gh](mailto:patrick.sakyi@uenr.edu.gh) (P.O.S.)

<sup>7</sup> Department of Biomedical Engineering, School of Engineering Sciences, College of Basic & Applied Sciences, University of Ghana, PMB LG 77, Legon, Accra, Ghana; [skkwofie@ug.edu.gh](mailto:skkwofie@ug.edu.gh) (S.K.K.)

<sup>8</sup> Department of Biochemistry, Cell and Molecular Biology, West African Centre for Cell Biology of Infectious Pathogens, College of Basic and Applied Sciences, University of Ghana, P.O. Box LG 54, Accra, Ghana;

<sup>9</sup> Department of Cognitive and Behavioral Neuroscience, Loyola University Chicago, Chicago, IL 60660, USA;

\* Correspondence: [wmiller6@luc.edu](mailto:wmiller6@luc.edu) (W.A.M., III)

### **Content**

Table S1: Toxicity risk prediction for the top 121 compounds and known inhibitor, 8-Azanebularine.

Figure S1: 2D representation of the protein-ligand interaction maps for ADAR2 complexed with (a) ZINC000095913861, (b) ZINC000085996580, (c) ZINC000070454467, (d) ZINC000042890265, and (e) ZINC000039183320.

Figure S2: 3D representation of the protein-ligand interaction for ADAR2 complexed with (a) ZINC000095913861, (b) ZINC000085996580, (c) ZINC000070454467, (d) ZINC000042890265, and (e) ZINC000039183320.

Figure S3: Root mean square fluctuation (RMSF) plot of the ADAR2-ligand complexes throughout the 100 ns MD simulations.

Figure S4: Per-residue energy decomposition of the ADAR2 in complex with (a) ZINC000042890265, (b) ZINC000039183320, (c) ZINC000101100339, (d) ZINC00008593577, (e) ZINC000085532375, and (f) 8-Azanebularine.

Table S1: Toxicity risk prediction for the top 121 compounds and known inhibitor, 8-Azanebularine.

| Compound ID      | Toxicity Risk |             |                        |          |
|------------------|---------------|-------------|------------------------|----------|
|                  | Mutagenic     | Tumorigenic | Reproductive Effective | Irritant |
| 8-Azanebularine  | None          | None        | None                   | None     |
| ZINC000004098302 | None          | None        | High                   | None     |
| ZINC000004098448 | None          | None        | High                   | None     |
| ZINC000005158749 | None          | None        | None                   | None     |
| ZINC000013310993 | High          | None        | Low                    | None     |
| ZINC000014637370 | None          | None        | High                   | None     |
| ZINC000014686335 | High          | None        | High                   | None     |
| ZINC000014825188 | None          | None        | High                   | None     |
| ZINC000015253910 | None          | None        | None                   | None     |
| ZINC000033832412 | None          | None        | None                   | None     |
| ZINC000039183320 | None          | None        | None                   | None     |
| ZINC000059586224 | None          | None        | High                   | None     |
| ZINC000059587555 | None          | None        | High                   | None     |
| ZINC000070451127 | None          | None        | None                   | None     |
| ZINC000070454885 | None          | None        | None                   | None     |
| ZINC000085532375 | None          | None        | Low                    | None     |
| ZINC000085543123 | None          | None        | None                   | High     |
| ZINC000085547677 | High          | Low         | High                   | High     |
| ZINC000085547700 | Low           | Low         | High                   | High     |
| ZINC000085569457 | None          | None        | High                   | High     |
| ZINC000085592995 | None          | None        | None                   | None     |
| ZINC000085593577 | None          | None        | High                   | None     |
| ZINC000095912378 | None          | None        | None                   | High     |
| ZINC000095912380 | None          | None        | None                   | High     |
| ZINC000095912466 | None          | None        | None                   | None     |
| ZINC000095912676 | None          | None        | High                   | None     |
| ZINC000095914813 | None          | None        | High                   | None     |
| ZINC000101100339 | None          | None        | None                   | None     |
| ZINC000103559699 | High          | High        | None                   | High     |
| ZINC000103572309 | None          | None        | None                   | None     |
| ZINC000103584057 | None          | None        | None                   | High     |
| ZINC000013384051 | None          | None        | High                   | None     |
| ZINC000015206058 | None          | None        | High                   | None     |
| ZINC000033830107 | None          | None        | High                   | None     |
| ZINC000042802834 | Low           | None        | None                   | None     |
| ZINC000042890265 | None          | None        | High                   | None     |
| ZINC000044031885 | None          | None        | None                   | None     |
| ZINC000044086846 | Low           | None        | None                   | None     |
| ZINC000044305204 | None          | None        | None                   | None     |
| ZINC000044305748 | None          | None        | None                   | None     |
| ZINC000044352188 | None          | None        | None                   | None     |
| ZINC000059589111 | None          | None        | None                   | None     |
| ZINC000070450948 | None          | None        | None                   | None     |

|                  |      |      |      |      |
|------------------|------|------|------|------|
| ZINC000070451048 | None | None | None | None |
| ZINC000070454051 | None | None | High | High |
| ZINC000070454074 | None | None | None | None |
| ZINC000070454124 | None | None | None | None |
| ZINC000070454467 | None | None | None | None |
| ZINC000070454501 | None | None | None | None |
| ZINC000085504890 | None | None | None | None |
| ZINC000085509705 | None | None | High | None |
| ZINC000085530461 | None | None | None | High |
| ZINC000085530478 | None | None | None | High |
| ZINC000085530480 | None | None | None | High |
| ZINC000085530487 | None | None | None | None |
| ZINC000085530490 | None | None | None | None |
| ZINC000085530497 | None | None | None | High |
| ZINC000085530502 | None | None | None | None |
| ZINC000085531494 | None | None | None | None |
| ZINC000085531496 | None | None | None | None |
| ZINC000085532213 | None | None | None | None |
| ZINC000085532258 | None | None | None | None |
| ZINC000085532309 | None | None | None | None |
| ZINC000085532312 | None | None | None | None |
| ZINC000085532324 | None | None | None | None |
| ZINC000085532381 | None | None | None | None |
| ZINC000085532390 | None | None | None | None |
| ZINC000085532442 | None | None | None | None |
| ZINC000085532515 | None | None | None | None |
| ZINC000085532517 | None | None | None | None |
| ZINC000085532519 | None | None | None | None |
| ZINC000085541078 | None | None | None | High |
| ZINC000085543212 | None | None | None | None |
| ZINC000085543539 | None | None | None | None |
| ZINC000085543544 | None | None | None | None |
| ZINC000085543571 | None | None | None | None |
| ZINC000085548190 | High | Low  | High | Low  |
| ZINC000085567825 | High | None | High | None |
| ZINC000085592927 | None | None | None | None |
| ZINC000085592968 | None | None | None | None |
| ZINC000085592982 | None | None | None | None |
| ZINC000085593001 | None | None | None | None |
| ZINC000085594038 | None | Low  | High | High |
| ZINC000085594040 | None | Low  | High | High |
| ZINC000085594044 | None | Low  | High | High |
| ZINC000085594048 | None | None | High | High |
| ZINC000085594057 | None | Low  | High | High |
| ZINC000085594065 | Low  | Low  | High | High |
| ZINC000085597267 | None | None | None | None |

|                  |      |      |      |      |
|------------------|------|------|------|------|
| ZINC000085597294 | None | None | None | None |
| ZINC000085597296 | None | None | None | None |
| ZINC000085628518 | None | None | None | None |
| ZINC000085631917 | None | None | None | None |
| ZINC000085633079 | None | None | High | None |
| ZINC000085761575 | High | None | None | High |
| ZINC000085854118 | None | None | None | None |
| ZINC000085932869 | None | None | High | None |
| ZINC000085976998 | High | High | None | High |
| ZINC000085991498 | Low  | None | None | None |
| ZINC000085996580 | None | None | High | None |
| ZINC000095910037 | None | None | High | None |
| ZINC000095910145 | Low  | None | None | None |
| ZINC000095910492 | Low  | None | None | High |
| ZINC000095910794 | None | None | None | None |
| ZINC000095911347 | None | None | None | None |
| ZINC000095912705 | None | None | None | High |
| ZINC000095913861 | None | None | High | None |
| ZINC000095914212 | Low  | Low  | None | None |
| ZINC000095914586 | None | None | None | None |
| ZINC000095914856 | High | None | None | None |
| ZINC000095915041 | None | None | None | None |
| ZINC000095918631 | Low  | None | None | None |
| ZINC000095919317 | None | None | None | None |
| ZINC000103526876 | None | None | None | High |
| ZINC000103527856 | Low  | None | High | High |
| ZINC000103527863 | None | Low  | High | High |
| ZINC000103527948 | Low  | None | High | High |
| ZINC000103543220 | None | Low  | None | Low  |
| ZINC000103568616 | Low  | None | None | None |
| ZINC000103572332 | None | None | None | High |
| ZINC000103578914 | None | High | None | Low  |
| ZINC000103585067 | None | None | None | None |

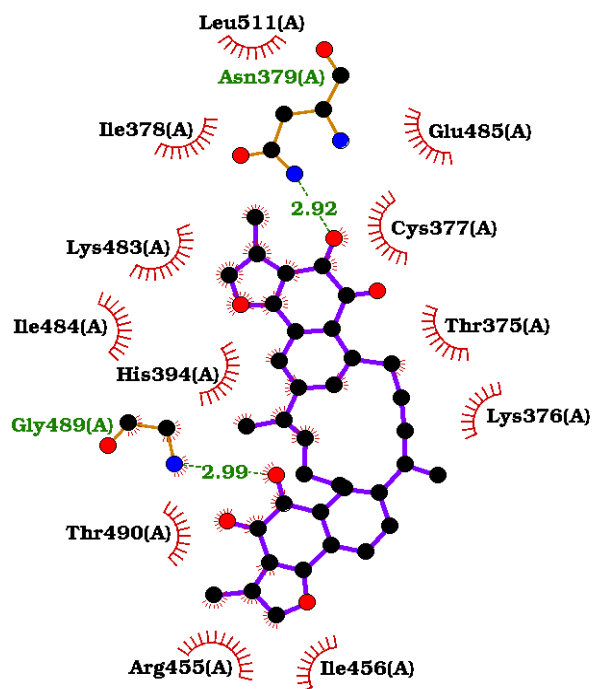

(a)

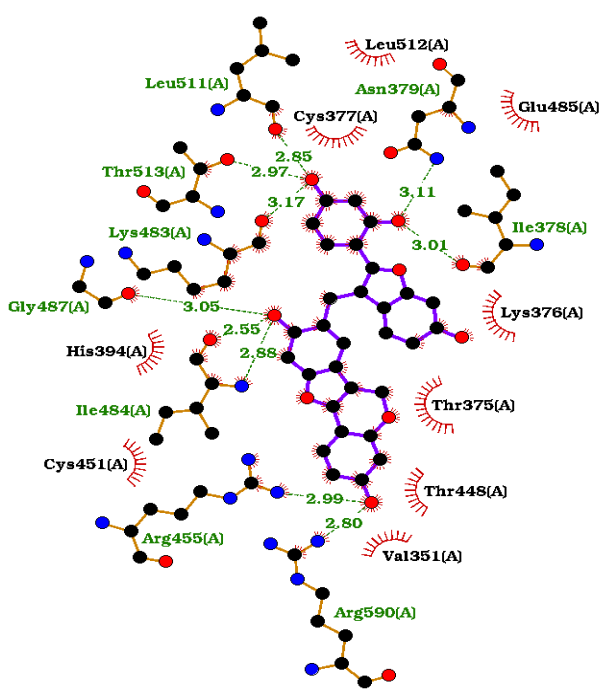

(b)

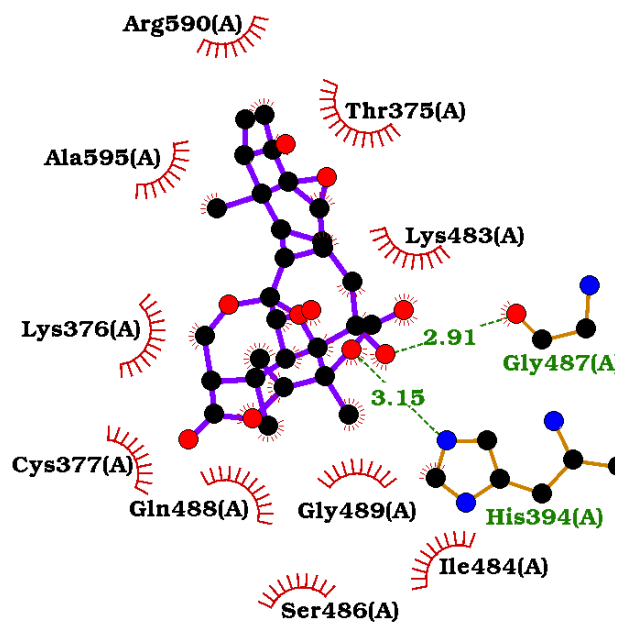

(c)

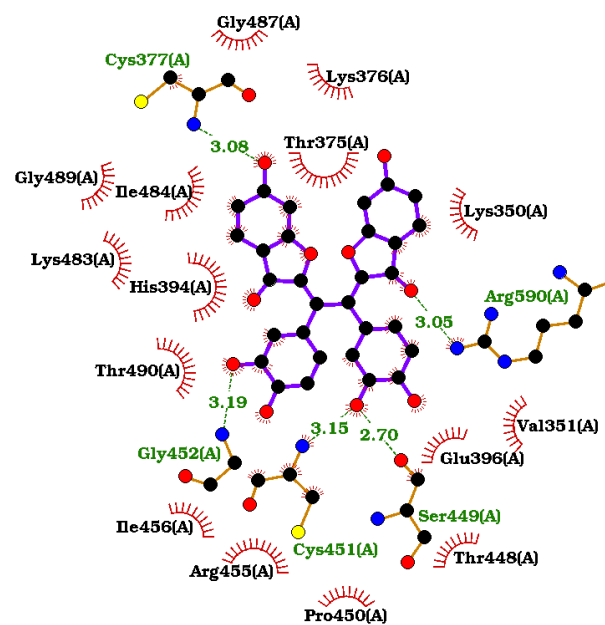

(d)

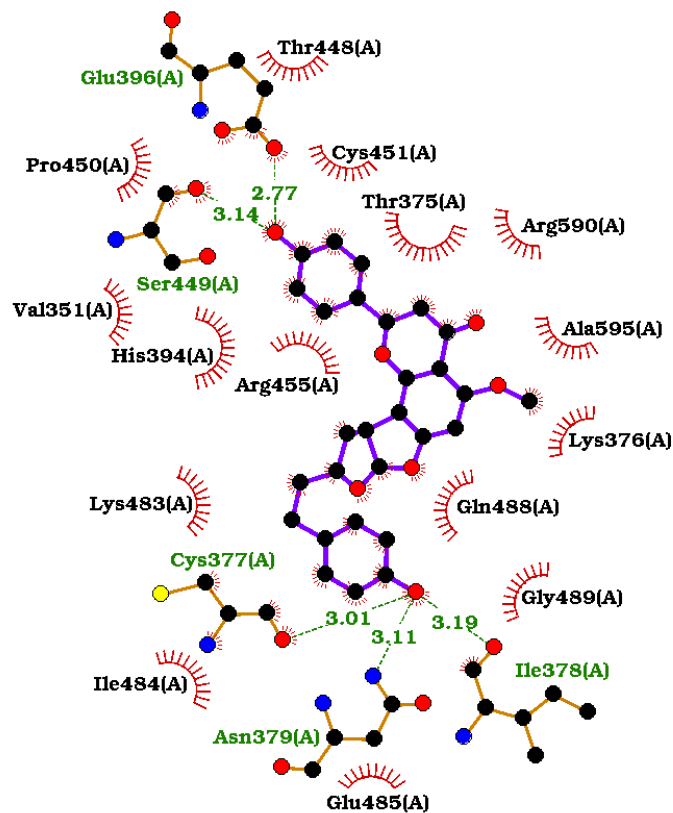

(e)

Figure S1: 2D representation of the protein-ligand interaction map for ADAR2 complexed with (a) ZINC000095913861, (b) ZINC000085996580, (c) ZINC000070454467, (d) ZINC000042890265, and (e) ZINC000039183320.

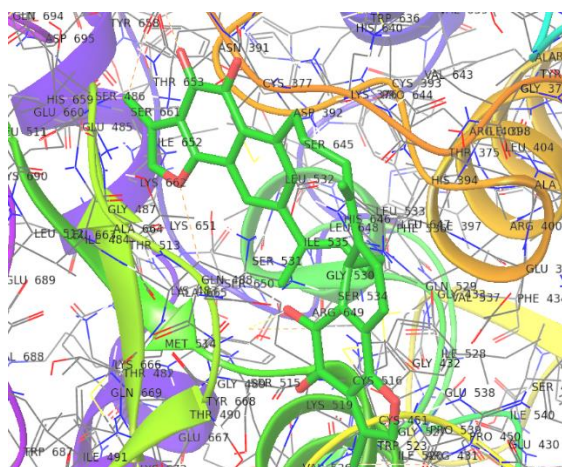

(a)

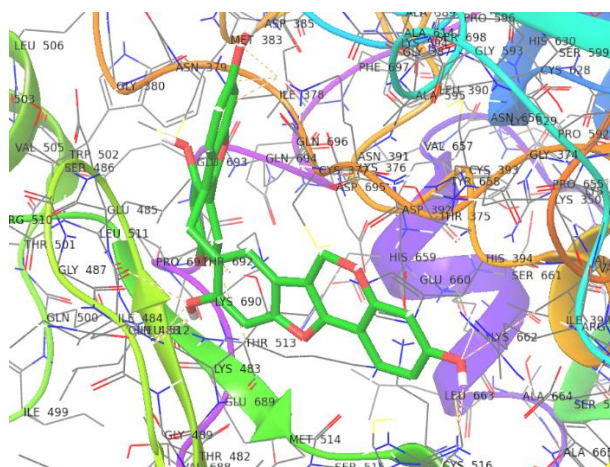

(b)



## RMS fluctuation

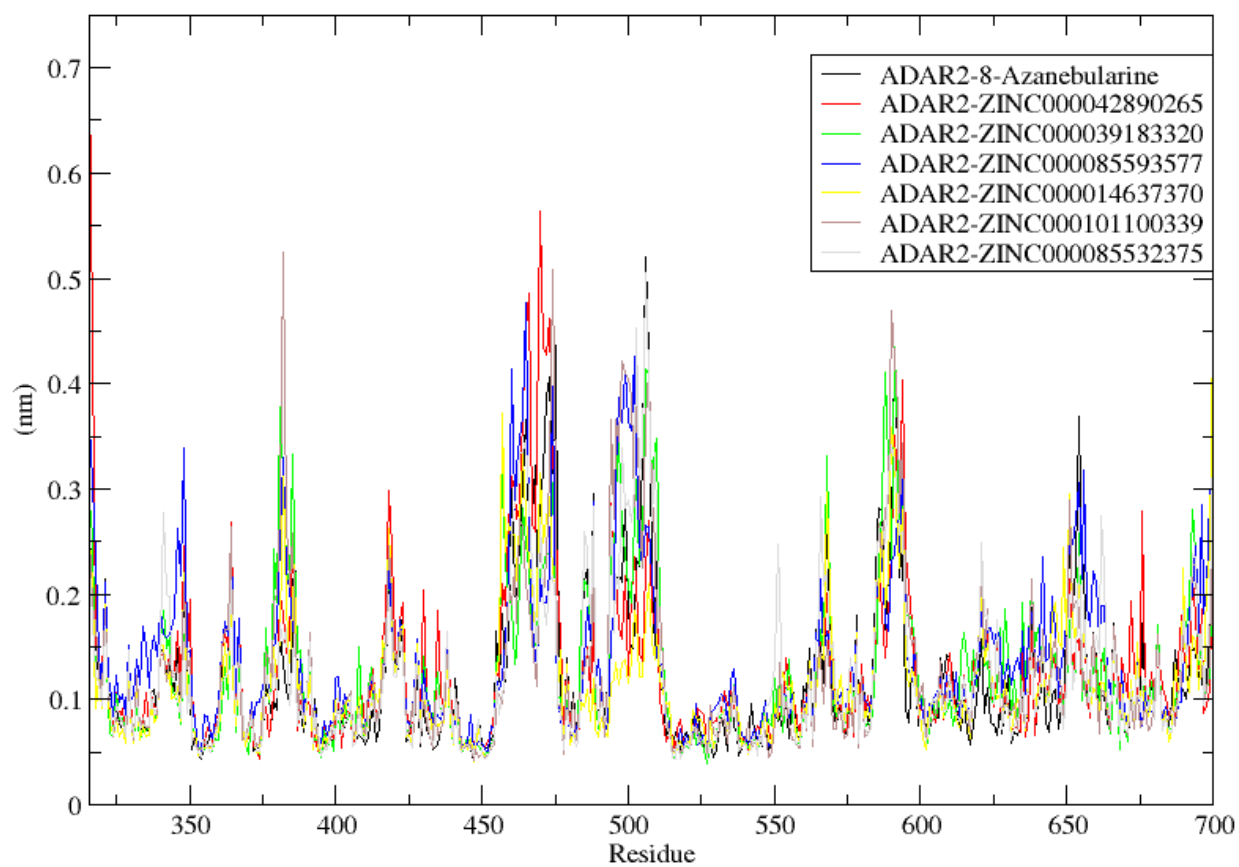

Figure S3: Root mean square fluctuation (RMSF) plot of the ADAR2-ligand complexes throughout the 100 ns MD simulations.

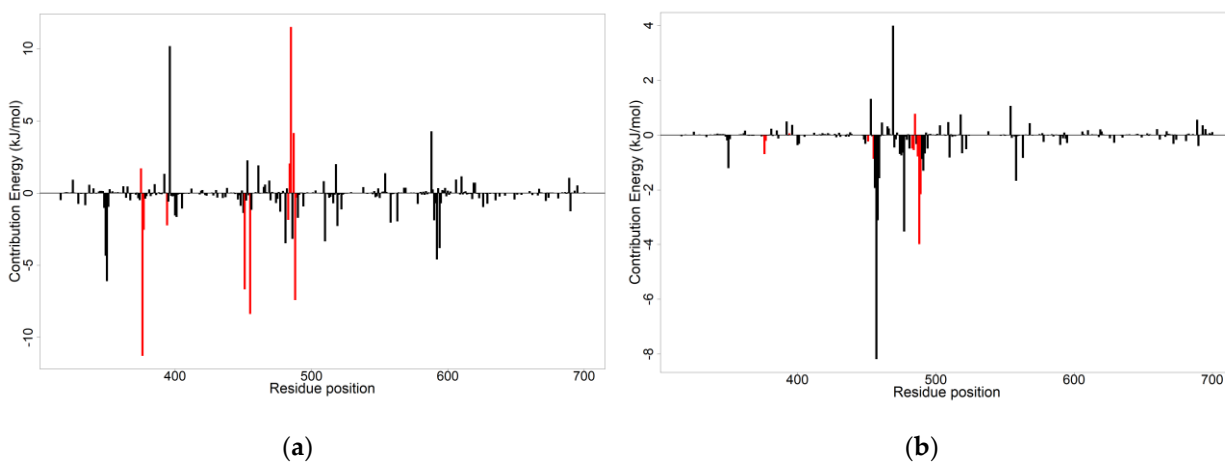

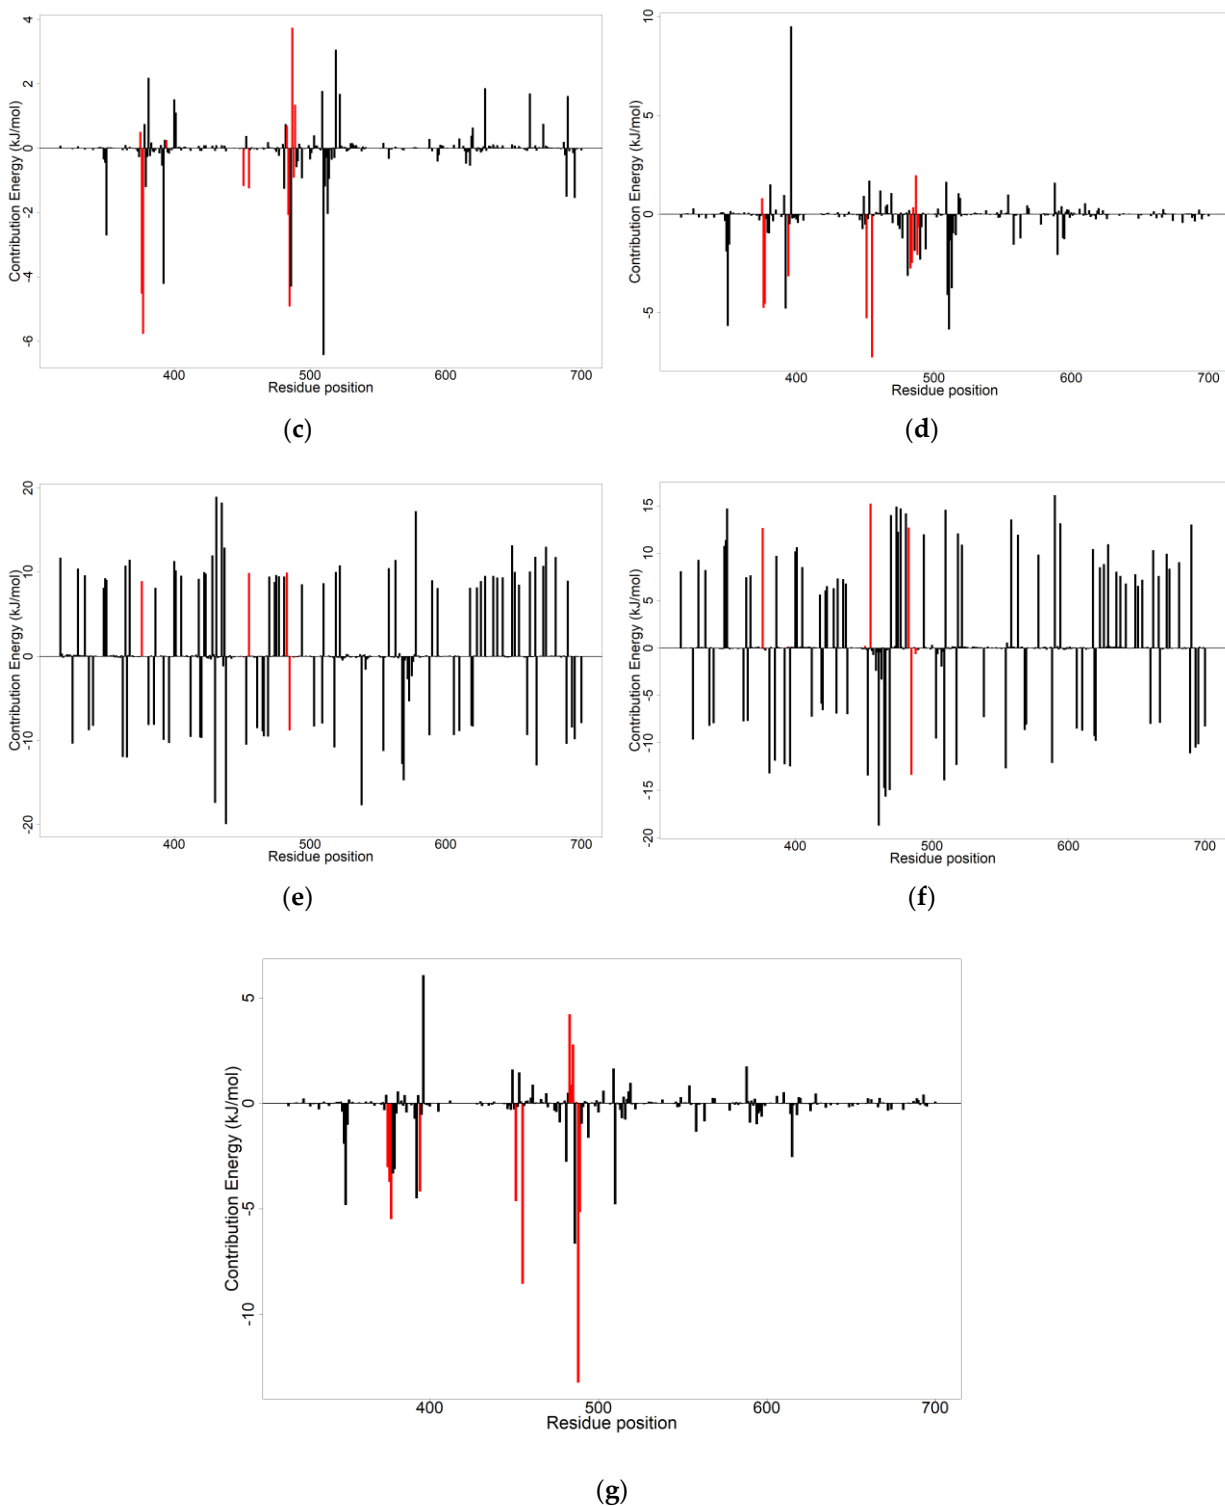

Figure S4: Per-residue energy decomposition of the ADAR2 in complex with (a) ZINC000042890265, (b) ZINC000039183320, (c) ZINC000101100339, (d) ZINC000085593577, (e) ZINC000085532375, (f) 8-Azanebularine, and (g) ZINC000014637370.
